# Supplementary material for: NAD+ boosting reduces age-associated amyloidosis and restores mitochondrial homeostasis in muscle
Source: PubMed Central journal article supplement — Cell Rep. 2021 Jan 19;34(3):108660. doi: 10.1016/j.celrep.2020.108660 (PMC7816122; doi:10.1016/j.celrep.2020.108660), 2021-01-19
Supplement: mmc1.pdf [file mmc1.pdf]

**Cell Reports, Volume 34**

**Supplemental Information**

**NAD<sup>+</sup> boosting reduces age-associated amyloidosis  
and restores mitochondrial homeostasis in muscle**

**Mario Romani, Vincenzo Sorrentino, Chang-Myung Oh, Hao Li, Tanes Imamura  
de Lima, Hongbo Zhang, Minhong Shong, and Johan Auwerx**

## Extended Figure 1

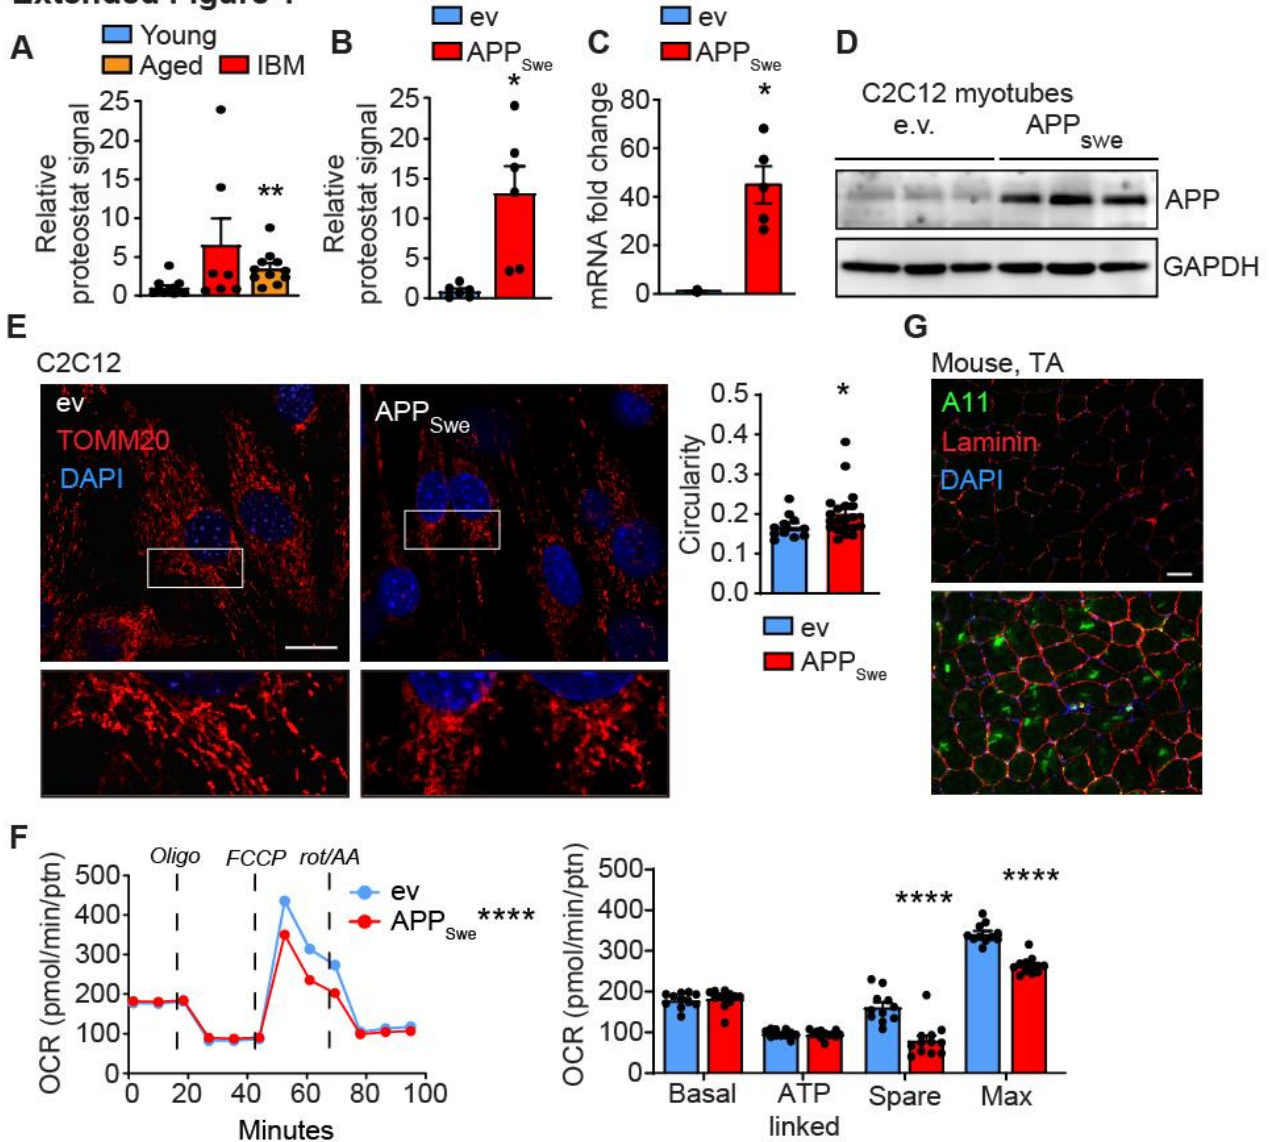

1

2 **Extended Figure 1. Proteostasis and mitochondrial alterations during aging and proteotoxic**

3 **stress in muscle cells (related to Figure 2). a-b,** Proteostat signal quantification normalized over

4 the number of cells for experiments shown in **Figure 1a-b** (Young  $n=11$ , aged  $n=7$ , IBM  $n=11$ ; C2C12

5  $n=6$ ). **c-d,** qRT-PCR RNA analysis ( $n=5$  biological replicates) (**c**) and APP immunoblotting ( $n=3$

6 biological replicates) (**d**) of control and APP<sub>Swe</sub>-expressing C2C12 myotubes. **e,** Confocal images of

7 control and APP<sub>Swe</sub>-expressing C2C12 myotubes, stained using a TOMM20 antibody to reveal the

8 mitochondrial network and relative circularity assessment (in which 1 represents a perfect circle and

9 0 a line) (scale bar, 50 $\mu$ m). **f,** Oxygen consumption rates in C2C12ev or APP<sub>Swe</sub>-expressing C2C12

10 myoblasts treated with oligomycin (Oligo), FCCP and rotenone/antimycin A (Rot-AA). Error bars

11 represent the mean  $\pm$  SEM. **e,** Representative images of immunostainings of laminin and A11

12 positive deposits in Tibialis anterior (TA) muscles of young (3 months) or aged (24 months) male  
 13 C57BL/6J mice. All experiments were performed independently at least twice. See **Methods** for  
 14 further details. Values in the figure are mean  $\pm$  s.e.m. \* $P$ <0.05; \*\*\*\* $P$  $\leq$ 0.0001.. For all the individual  
 15 p values, see the **Excel data source Extended Fig. 1**.  
 16

**Extended Figure 2**

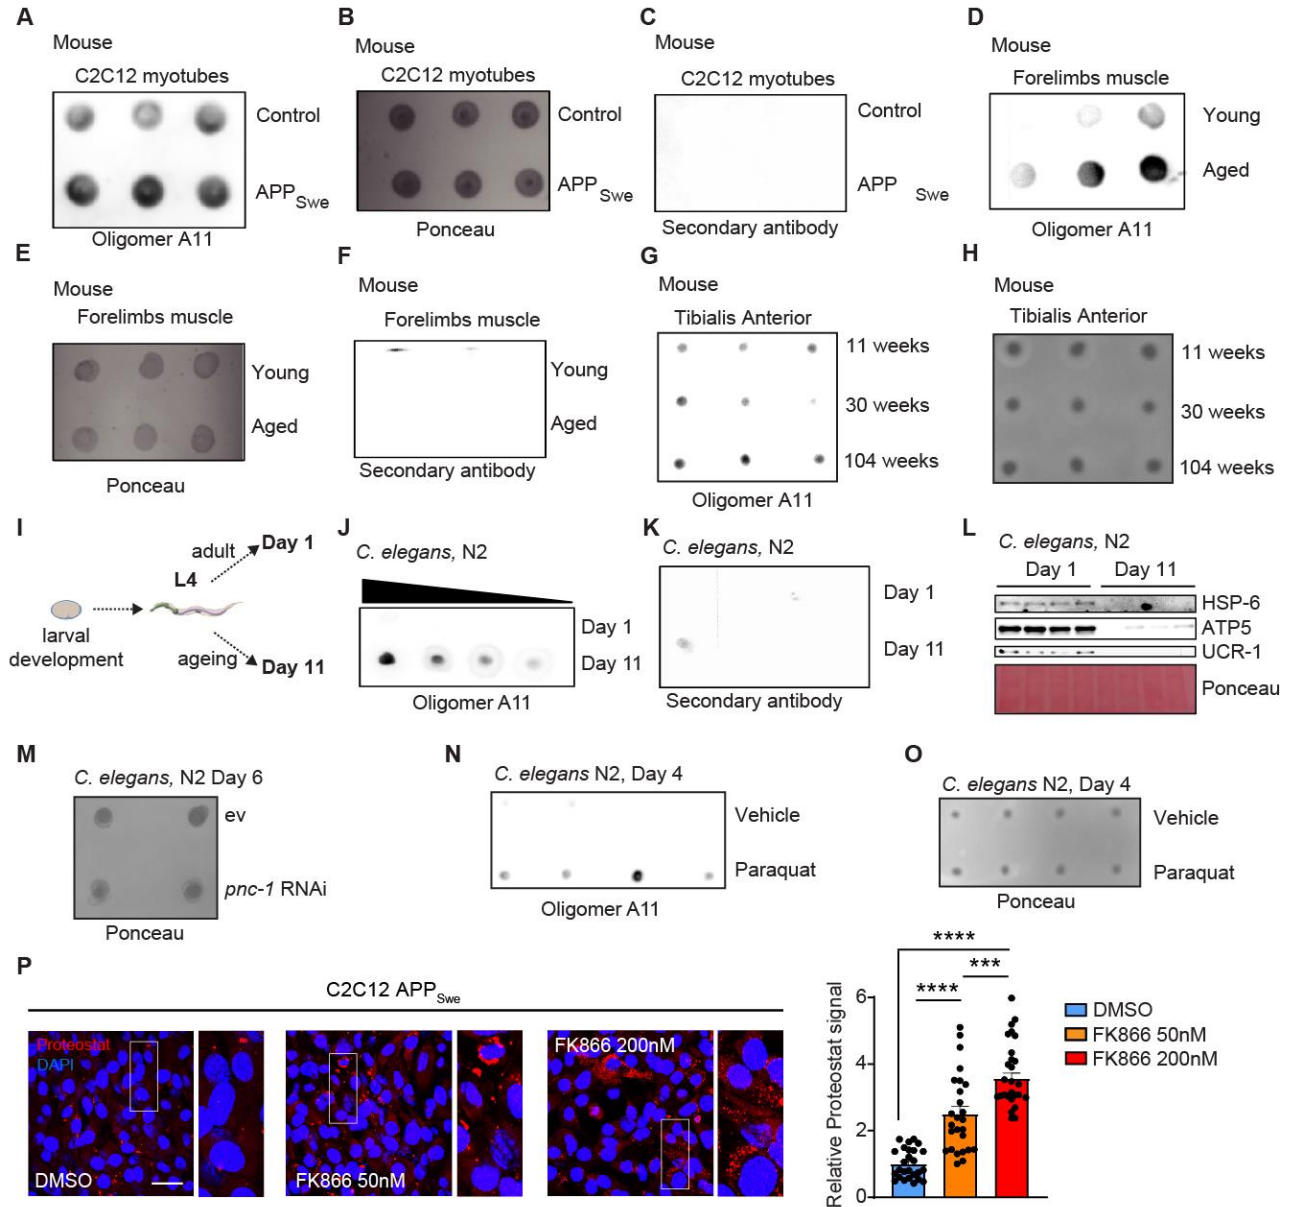

17  
 18 **Extended Figure 2. Dot blotting to detect amyloid-like deposits in mouse muscle and in *C.***  
 19 ***elegans* (related to Figure 2).** a,d,g, Dot blot analyses based on A11 antibody detection of protein  
 20 lysates from control and APP<sub>Swe</sub>-expressing C2C12 myotubes (a,  $n$ =3 biological replicates per  
 21 group), young (3 months) and old (24 months) male C57BL/6J mice (d,  $n$ =3 mice per group) and

22 11, 30 or 104 weeks old male C57BL/6J mice (**g**,  $n=3$  mice per group). Relative quantification of the  
23 blot intensities is reported in **Extended Data Table 5. b,e,h**, Ponceau staining, as a loading control,  
24 of the membranes loaded with protein lysates from control and APP<sub>Swe</sub>-expressing C2C12 cells (**b**,  
25  $n=3$  biological replicates per group), young and old mice (**e**,  $n=3$  mice per group), and 11, 30 or 104  
26 weeks old mice(**h**,  $n=3$  mice per group). These blots correspond to **a, d** and **h. c,f**, Control  
27 experiment for the dot blotting analysis of the same samples as in **a** and **d**, using only the secondary  
28 antibody. **i**, Schematic for the *C. elegans* experimental observations in **Figure 2e,g,h,i** and  
29 **Extended Figure 2 j,k,m** using young (day 1) and aged (day 11) N2 worms. **j**, Serial dilutions of 1  
30 biological sample from young (day 1) and aged (day 11) N2 worms, showing the specificity of  
31 detection of the A11 antibody in worm protein lysates. **k**, Control experiment for the dot blotting  
32 analysis of the samples in **Figure 2k**, using only the secondary antibody. **l**, Immunoblot of the  
33 mitochondrial proteins HSP-6, ATP5 and UCR-1 from young and old N2 worms. **m**, Ponceau  
34 staining, as a loading control, of the membrane loaded with protein lysates from **Figure 2i. n-o**, A11  
35 dot blotting of N2 (day 4) worms treated with paraquat (50uM) ( $n=4$  biological replicates per group)  
36 and relative ponceau staining. Relative quantification of the blot intensities is reported in  
37 **Supplementary Table 5. p**, Representative confocal images and relative quantification of APP<sub>Swe</sub>-  
38 expressing C2C12 myoblasts (scale bar, 10 $\mu$ m) treated with FK866 (50 or 200nM) and stained with  
39 the Proteostat fluorescent dye. All experiments were performed independently twice. Values in the  
40 figure are mean  $\pm$  s.e.m. \*\*\* $P\leq 0.001$ ; \*\*\*\* $P\leq 0.0001$ . For all the individual p values, see the **Excel**  
41 **data source Extended Fig. 2.**

42

43

Extended Figure 3

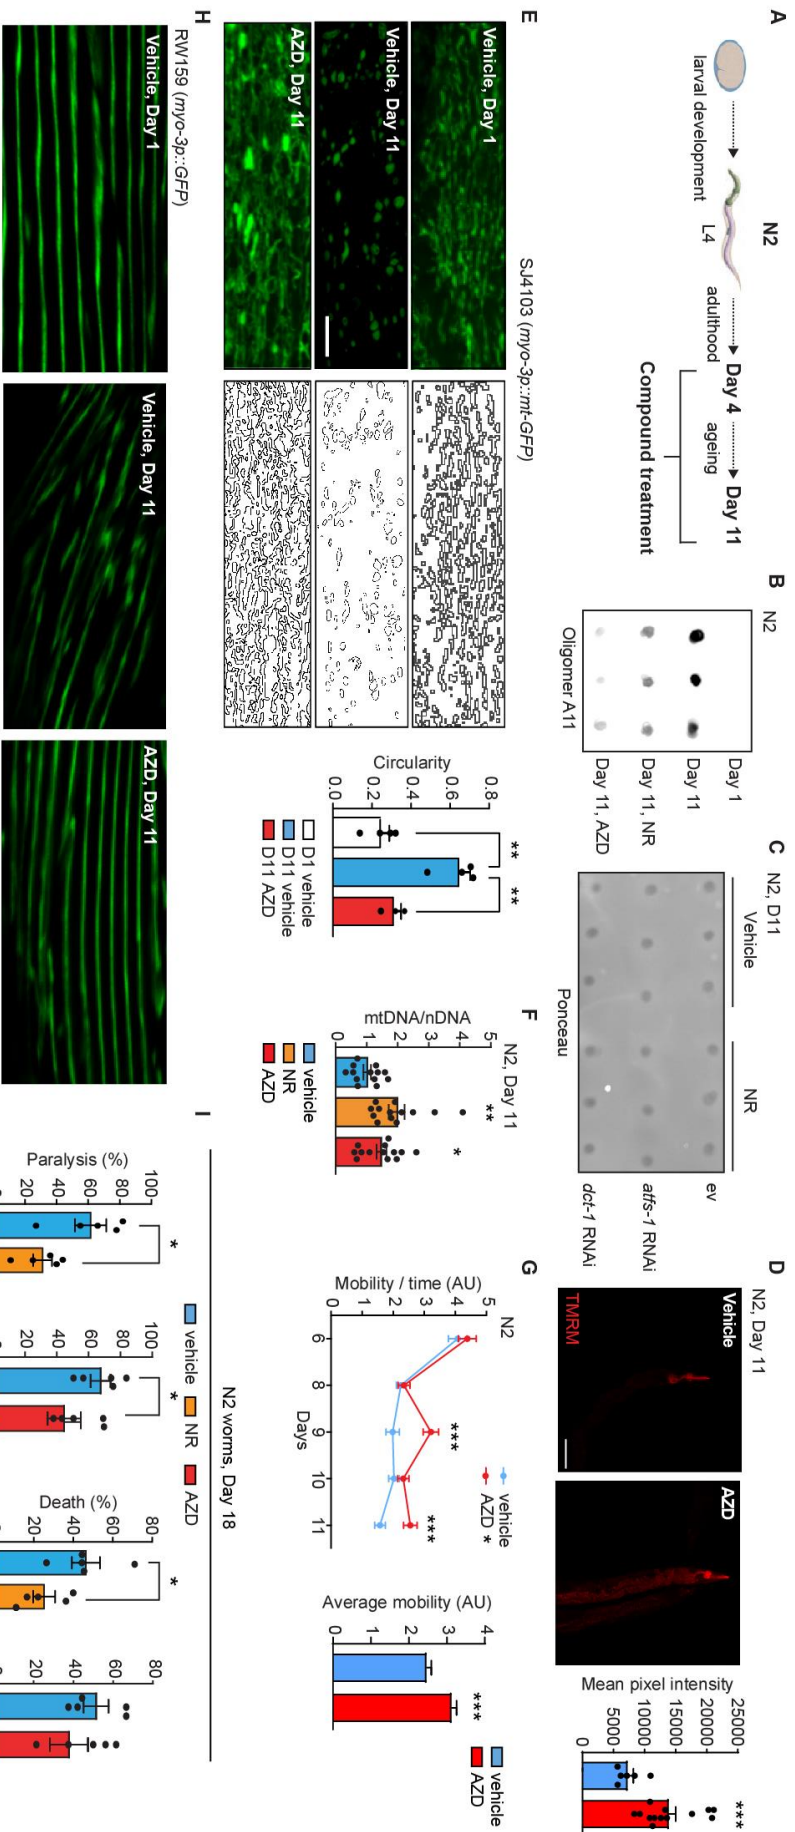

45 **Extended Figure 3. AZD treatment improves mitochondrial and fitness parameters in aged *C.***  
46 ***elegans* (related to Figure 3).** **a**, Scheme of the experimental design including compound  
47 interventions during aging in N2 worms. **b**, A11 dot blotting of young (day 1) and aged (day 11) N2  
48 worms treated as indicated in **a**, with NR (1mM) and a PARP inhibitor (AZD; 300nM) ( $n=3$  biological  
49 replicates per group). Day 1 and day 11 samples are the same as **Fig 2e**. Relative quantification of  
50 the blot intensities is reported in **Supplementary Table 5**. **c**, Ponceau staining, as a loading control,  
51 of the membrane loaded with protein lysates from **Figure 3b**. **d**, Confocal images of TMRM staining  
52 of aged (day 11) N2 worms treated as indicated in **Extended Fig 3a**, with AZD (300uM) (Vehicle,  
53  $n=6$ ; AZD,  $n=13$  worms) and relative quantification. Scale bar, 100 $\mu$ m. **e**, Confocal images of  
54 mitochondrial networks and corresponding morphology analyses including mitochondria outline and  
55 circularity assessment (in which 1 represents a perfect circle and 0 a line) in young (day 1) and aged  
56 (day 11) SJ4103 (*myo-3p::mt-GFP*) worms treated with AZD (300 nM) following the experimental  
57 pipeline shown in **Fig. 3a** (D1,  $n=3$ ; D11,  $n=4$ ; D11 AZD,  $n=3$ ). Scale bar, 10 $\mu$ m. **f**, mtDNA/nDNA  
58 ratio in N2 worms treated with NR (1mM) and AZD (300 nM) ( $n=13$  animals per group). **g**,  
59 Spontaneous mobility and average mobility of N2 worms treated with vehicle or AZD (300 nM) as in  
60 **a** (vehicle,  $n=70$ ; AZD,  $n=80$  worms). Overall differences between conditions were assessed by two-  
61 way ANOVA (Average mobility); differences between conditions at individual time points were  
62 assessed using post hoc Sidak's multiple comparison test. **h**, Confocal images of GFP-labeled  
63 muscle fibers in young (day 1) and aged (day 11) RAW1596 (*myo-3p::GFP*) worms treated with AZD  
64 (300 nM) as in **a** ( $n=20$  per group). Scale bar, 10 $\mu$ m. **i**, Percentage of paralyzed and dead D18 N2  
65 worms after vehicle or AZD treatment ( $n=5$  biological replicates). See **Methods** for further details.  
66 Values in the figure are mean  $\pm$  s.e.m. \* $P<0.05$ ; \*\* $P\leq 0.01$ ; \*\*\* $P\leq 0.001$ . Differences for two groups  
67 were assessed using two-tailed  $t$  tests (95% confidence interval) in panel **a**, **b**, **d**, and **e**. All  
68 experiments were performed independently at least twice. AU, arbitrary units. For all the individual  
69 p values, see the **Excel data source Extended Fig. 3**.

70

71

72

Extended Figure 4

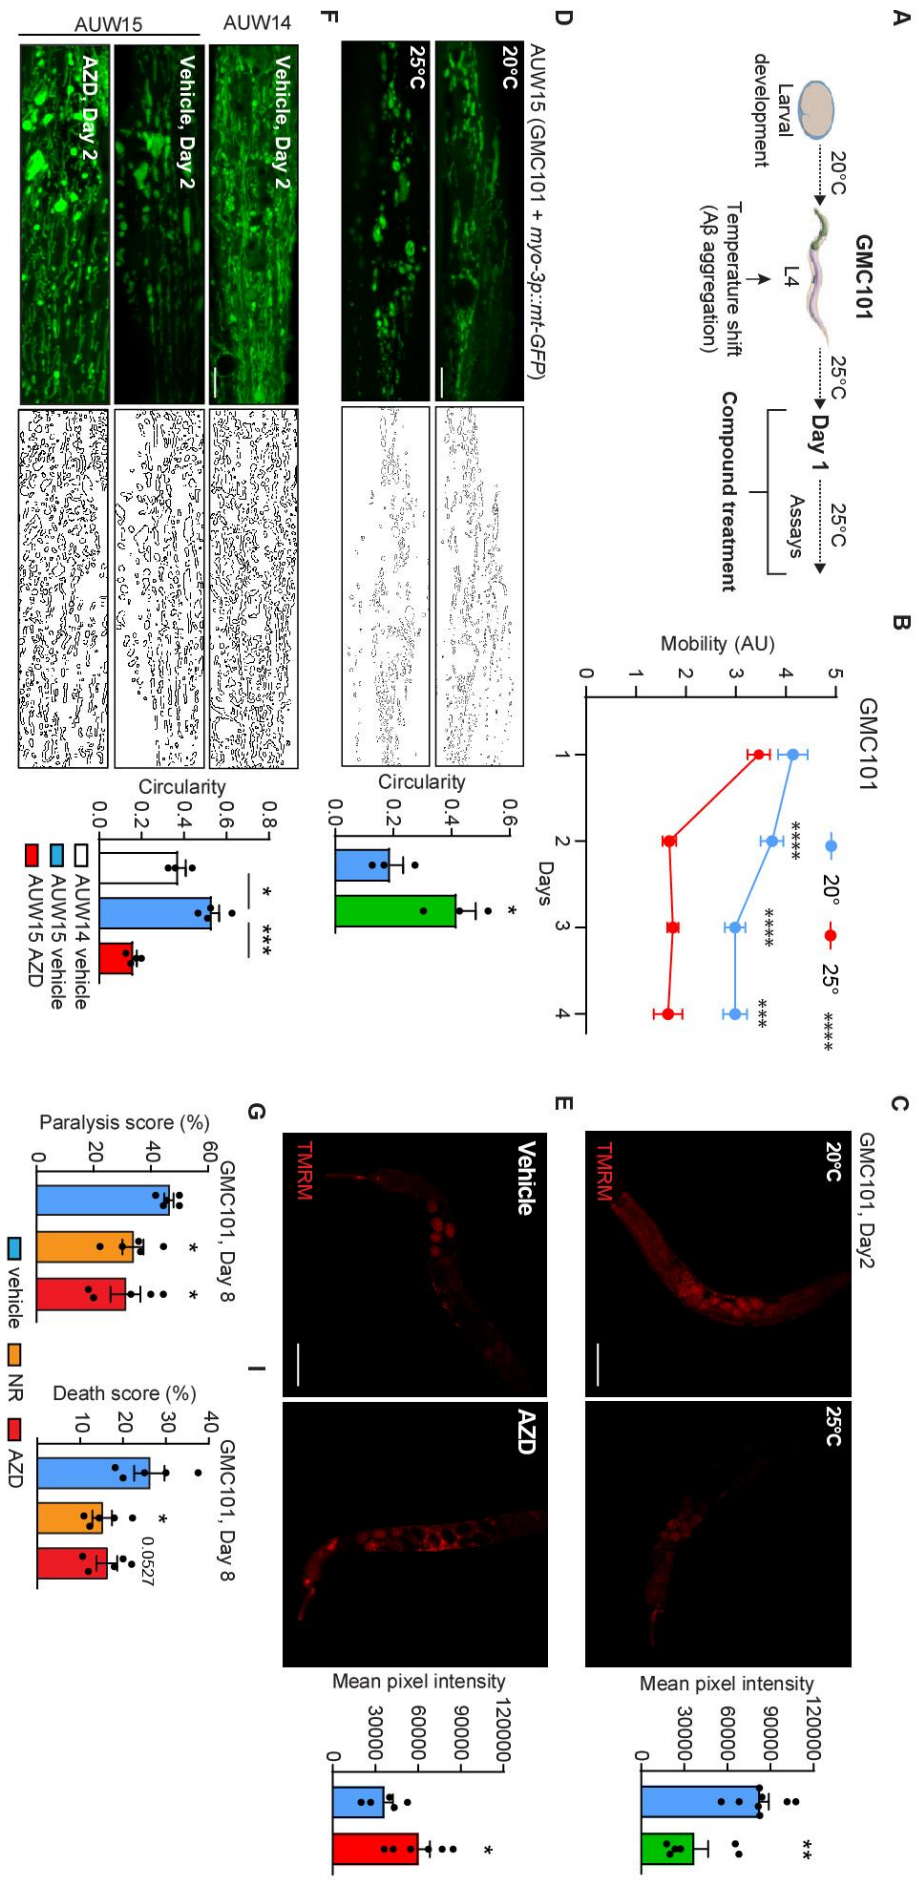

74 **Extended Figure 4. AZD beneficially impacts on A $\beta$  -associated mitochondrial dysfunction in**  
75 ***C.elegans* (related to Figure 5).** **a**, Scheme of the experimental design including activation of A $\beta$ -  
76 aggregation and compound interventions in GMC101 worms. **b**, Spontaneous mobility of GMC101  
77 worms cultured at 20° or 25°C as in **a** (20°C,  $n=46$ ; 25°C,  $n=43$  worms). Overall differences between  
78 conditions were assessed by two-way ANOVA; differences between conditions at individual time  
79 points were assessed using post hoc Sidak's multiple comparison test. **c**, Confocal images of TMRM  
80 staining of day 2 GMC101 worms cultured at 20° or 25°C (20°C,  $n=8$ ; 25°C,  $n=6$  worms) and relative  
81 quantification. Scale bar, 100 $\mu$ m. **d**, Confocal images of mitochondrial networks and corresponding  
82 morphology analyses including mitochondria outline and circularity assessment (in which 1  
83 represents a perfect circle and 0 a line) in Day 2 AUW15 (GMC101 + *myo-3p::mt-GFP*) worms  
84 cultured at 20° or 25°C ( $n=3$  per group). Scale bar, 10 $\mu$ m. **e**, Confocal images of TMRM staining of  
85 day 2 GMC101 worms cultured at 25°C and treated with AZD (300nM) as in **a** (Vehicle,  $n=5$ ; AZD,  
86  $n=6$  worms) and relative quantification. Scale bar, 100 $\mu$ m. **f**, Confocal images of mitochondrial  
87 networks and corresponding morphology analyses including mitochondria outline and circularity  
88 assessment (in which 1 represents a perfect circle and 0 a line) in Day 2 AUW14 (CL2122 + *myo-*  
89 *3p::mt-GFP*) and AUW15 (GMC101 + *myo-3p::mt-GFP*) worms cultured at 25°C and treated with  
90 AZD (300nM) as in **a** (AUW14,  $n=3$ ; AUW15 Vehicle,  $n=4$ ; AUW15 AZD,  $n=4$  worms). Scale bar,  
91 10 $\mu$ m. **g-h**, Percentage of paralyzed (**f**) and dead (**g**) D8 GMC101 worms after compound treatment  
92 ( $n=5$  biological replicates). For all the individual p values, see the **Excel data source Extended Fig.**  
93 **3**. Values in the figure are mean  $\pm$  s.e.m. \* $P<0.05$ ; \*\* $P\leq 0.01$ ; \*\*\* $P\leq 0.001$ ; \*\*\*\* $P\leq 0.0001$ .

94



Extended Figure 5

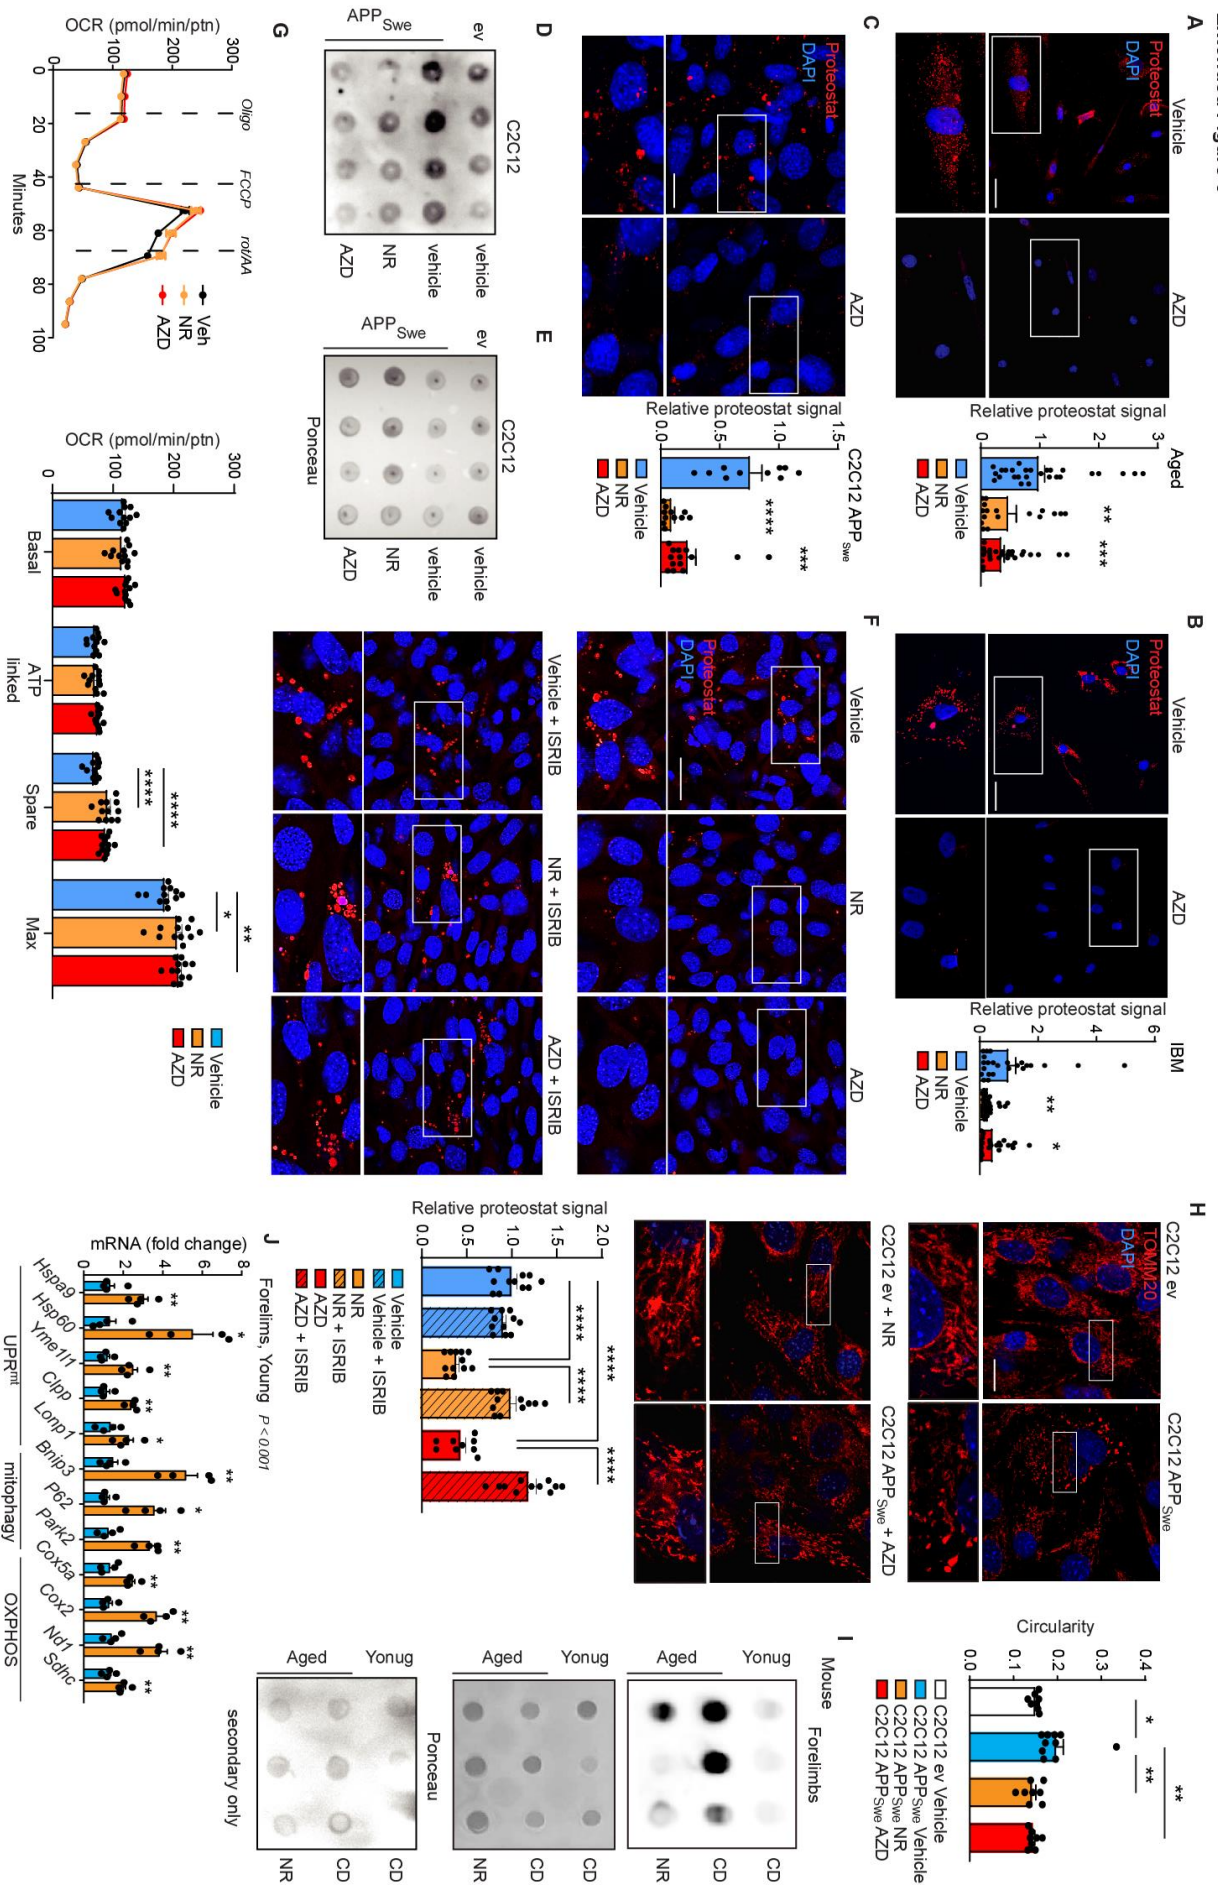

96 **Extended Figure 5. NAD<sup>+</sup> boosting interventions and their effects on proteostasis and**  
97 **mitochondria in cells and in vivo (related to Figure 6).** **a-c**, Representative confocal images of  
98 primary human muscle cells from an aged and an IBM donor, (scale bar, 50µm) (**a,b**), or APP<sub>Swe</sub>-  
99 expressing C2C12 myotubes (scale bar, 10µm) (**c**) treated with AZD (1uM) and stained with the  
100 Proteostat fluorescent dye and relative Proteostat signal quantification normalized on the number of  
101 cells for experiments shown in **Figure 5a-c** (Aged+vehicle *n*=34, aged+NR *n*=17, aged+AZD *n*=33;  
102 IBM+vehicle *n*=25, IBM+NR *n*=25, IBM+AZD *n*=31; C2C12+Vehicle *n*=11, C2C12+NR *n*=11,  
103 C2C12+AZD *n*=14). **d,e**, A11 dot blot analyses of protein lysates from APP<sub>Swe</sub>-expressing C2C12  
104 myotubes (*n*=4 biological replicates per group) after compound treatment (NR, 3mM; AZD, 1uM) and  
105 relative ponceau control. Relative quantification of the blot intensities is reported in **Extended Data**  
106 **Table 5. f**, Representative confocal images of APP<sub>Swe</sub>-expressing C2C12 myoblast (scale bar,  
107 10µm) treated with NR (1mM), AZD (1uM), and ISRIB (0,5uM) and stained with the Proteostat  
108 fluorescent dye and relative Proteostat signal quantification normalized on the number of cells  
109 (Vehicle *n*=13, Vehicle + ISRIB *n*=11, NR *n*=12, NR + ISRIB *n*=12, AZD *n*=9, AZD + ISRIB *n*=11).  
110 **g**, Oxygen consumption rates in C2C12ev or APP<sub>Swe</sub>-expressing C2C12 myoblasts treated with NR  
111 (3mM) or AZD (1uM) and oligomycin (Oligo), FCCP and rotenone/antimycin A (Rot-AA). Error bars  
112 represent the mean ± SEM. **h**, Representative confocal images of control and APP<sub>Swe</sub>-expressing  
113 C2C12 myotubes and corresponding morphology analyses including mitochondria outline and  
114 circularity assessment (in which 1 represents a perfect circle and 0 a line) after compound treatment  
115 (NR, 3mM; AZD, 1uM), stained using a TOMM20 antibody to reveal the mitochondrial network (scale  
116 bar, 50µm). **i**, A11 dot blot analyses and relative controls of protein lysates from young (3 months)  
117 and old (24 months) male C57BL/6J mice (*n*=3 mice per group) in control conditions and after  
118 compound treatment (NR, 3mM). Relative quantification of the blot intensities is reported in  
119 **Extended Data Table 5. I**, MSR transcript analysis of forelimbs muscles of young male mice  
120 C57BL/6J following NR treatment (*n*=4 animals). For all the individual p values, see the **Excel data**  
121 **source Extended Fig. 5**. Values in the figure are mean ± s.e.m. \**P*<0.05; \*\**P*≤0.01; \*\*\**P*≤0.001;  
122 \*\*\*\**P*≤0.0001.

123

## Extended Figure 6

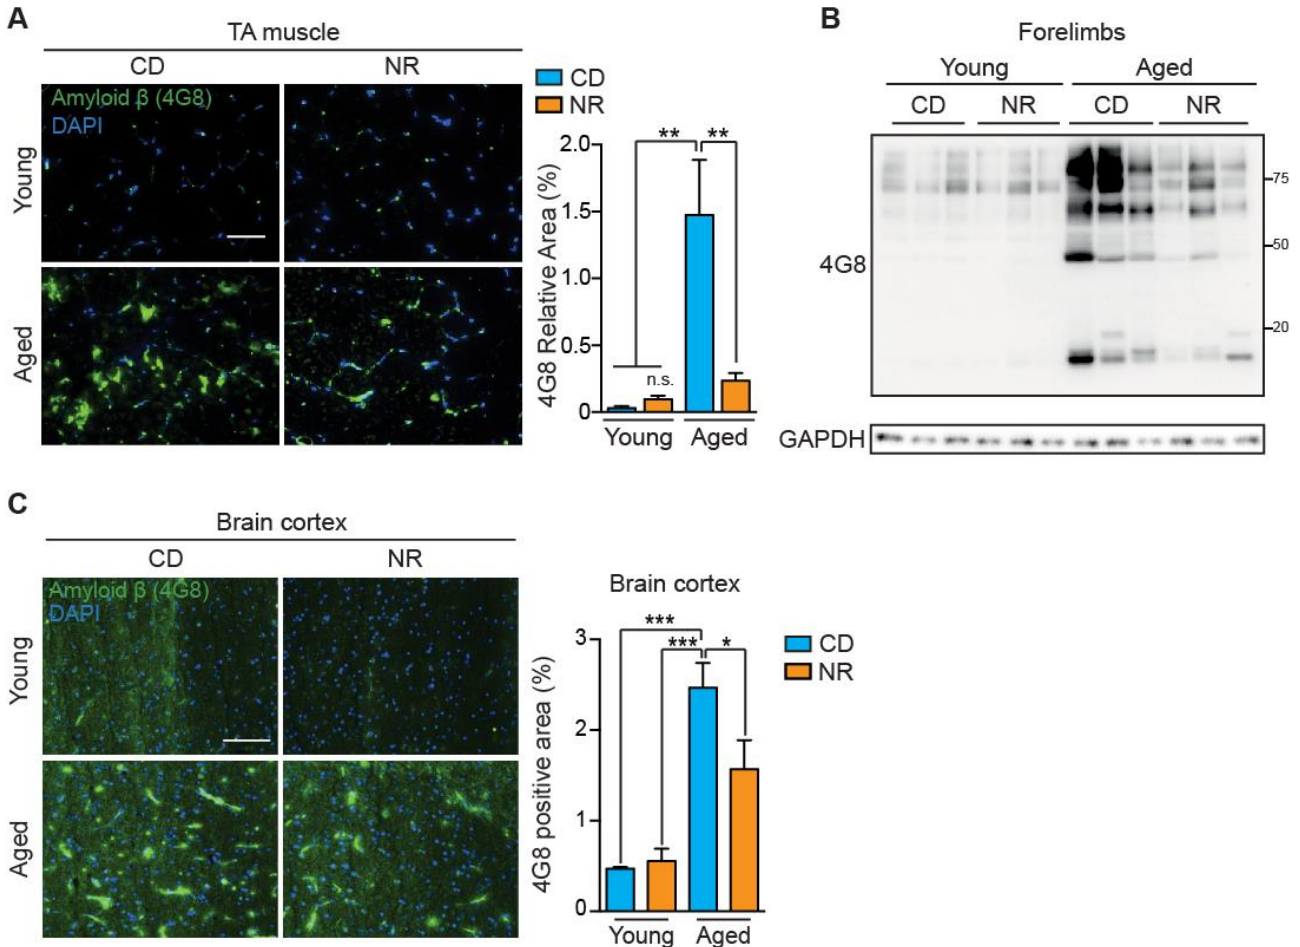

124

125 **Extended Figure 6. NAD<sup>+</sup> boosting interventions and their effects on APP and its byproducts**

126 **in vivo (related to Figure 6).** a, Representative images and corresponding quantification of

127 immunostainings of 4G8 positive protein deposits in Tibialis anterior (TA) muscles of young or aged

128 male C57BL/6J mice, fed for 8 weeks with chow diet (CD) or chow diet supplemented with NR

129 (400mg/kg/day) ( $n = 5-7$  per group). Scale bar, 50 $\mu$ m. b, Immunoblot of 4G8 reactive proteins and

130 byproducts from forelimb muscles of the animals in a ( $n=3$  animals per group). c, Representative

131 images and corresponding quantification of immunostainings of 4G8 positive protein deposits in

132 brain of young or aged male C57BL/6J mice, fed for 8 weeks with chow diet (CD) or chow diet

133 supplemented with NR (400mg/kg/day) ( $n = 5-7$  per group). Scale bar, 50 $\mu$ m. Values in the figure

134 are mean  $\pm$  s.e.m. \* $P < 0.05$ ; \*\* $P \leq 0.01$ ; \*\*\* $P \leq 0.001$ . Differences for two groups were assessed using

135 two-tailed  $t$  tests (95% confidence interval). For all the individual p values, see the **Excel data**

136 **source Extended Fig. 6.**

137

| Gene Symbol      | Gene ID | Forward                   | Reverse                  |
|------------------|---------|---------------------------|--------------------------|
| <i>act-1</i>     | 179535  | CTACGAACTTCTGACGGACAAG    | CCGGCGGACTCCATACC        |
| <i>pmp-3</i>     | 179968  | GTTCCCGTGTTCATCACTCAT     | ACACCGTCGAGAAGCTGTAGA    |
| <i>hsp-6</i>     | 178873  | AGAGCCAAGTTCGAGCAGAT      | TCTTGAACAGTGGCTTGACAC    |
| <i>hsp-60</i>    | 175316  | GGAAGCCCAAAGATCACAAA      | CAGCCTCCTATTAGCCTTG      |
| <i>yme1-1</i>    | 176460  | CAAAACCTGATCTCGCTGGG      | TTCTCAATGTCGGCTCCAGT     |
| <i>clpp-1</i>    | 174594  | TGATAAGTGACCAGTGTCCA      | TGATTCTGGAGTTCGGGAGA     |
| <i>lonp-1</i>    | 172966  | CGATGATGGCCATTGTGCAG      | CGCTTTGAAACATCAATTCATCCA |
| <i>sqst-1</i>    | 178139  | GATCCTCCGACCACTCCAAA      | TGGAAGTGGTGAACGATCA      |
| <i>dct-1</i>     | 181053  | GCAAAGCCGTCTCAAACCC       | ACCCACGATTCTGACATACCA    |
| <i>pdr-1</i>     | 176816  | AGCCACCGAGCGATTGATTGC     | GTGGCATTGGGCATCTTCTTG    |
| <i>pink-1</i>    | 173918  | AAGCACCGAAATTGCGACG       | ACGAGATGGGAGTGTGGTA      |
| <i>polg-1</i>    | 174860  | TGTTACGGCCGACGAGATAC      | TTCCAGGTTTTCGGCGGTA      |
| <i>hmg-5</i>     | 177543  | CGTCCAAGTGTCTCCAAGTG      | CTTCGCTTCGTGTGTACTTCTTT  |
| <i>sdhb-1</i>    | 174482  | CAGATGCACCAAAGTGTGGC      | GTTCGGTGGCGTAGTCATCA     |
| <i>cco-1</i>     | 172832  | GCTCGTCTTGCTGGAGATGATCGTT | GGTCGGCGTCGACTCCCTTG     |
| <i>cox-4</i>     | 173237  | GCCCAATTGCGCCAAGGA        | AGGTTGGCGGCAAGTCTGGG     |
| <i>nduo-1</i>    | 2565698 | AGCGTCATTTATTGGGAAGAAGAC  | AAGCTTGCTAATCCCATAAATGT  |
| <i>MTCE.26-1</i> | 2565700 | GGTTGTGGGACTAGGTGAACA     | CAGGGTGCCCAATTGTTCTT     |
| <i>Gapdh</i>     | 14433   | TGTGTCCTGCTGGATCTGA       | CCTGCTTACCACCTTCTTGAT    |
| <i>B2m</i>       | 12010   | ATGGGAAGCCGAACATACTG      | CAGTCTCAGTGGGGTGAAT      |
| <i>Hspa9</i>     | 15526   | AATGAGAGCGCTCCTTGCTG      | CTGTTCCCAAGTCCAGAAC      |
| <i>Hsp60</i>     | 15510   | GCTGTAGCTGTACAATGGGG      | TGACTTTGCAACAGTGACCC     |
| <i>Yme1l1</i>    | 27377   | AGGGACCTTGATTATCTGAAC     | TGGGATGTATGCCAATGGGAA    |
| <i>Clpp</i>      | 53895   | TGTTGCGGGAACGCATCGTGT     | TAGATGGCCAGGCCCGCAGTT    |
| <i>Lonp1</i>     | 74142   | ATGACCGTCCCGGATGTGT       | CCTCCACGATCTTGATAAAGCG   |
| <i>Bnip3</i>     | 12176   | CCTGTGCGAGTTGGGTTT        | GAAGTGCAGTTCTACCCAGGAG   |
| <i>Sqstm1</i>    | 18412   | GCTGAAGGAAGCTGCCCTAT      | TTGGTCTGTAGGAGCCTGGT     |
| <i>Park2</i>     | 50873   | CCGAATCACCTGACGGTTCA      | TCTGGCTGCTTCTGAATCCC     |
| <i>Cox5a</i>     | 12858   | GAGCCCAAATCATTGATGC       | TGAGGTCCTGCTTTGTCTT      |
| <i>Cox2</i>      | 17709   | AACCGAGTCGTTCTGCCAAT      | CTAGGGAGGGGACTGCTCAT     |
| <i>Nd1</i>       | 17716   | CAAACACTTATTACAACCAAGAACA | TCATATTATGGCTATGGGTCAGG  |
| <i>Sdhc</i>      | 66052   | GCTGCGTCTTGCTGAGACA       | ATCTCCTCTTAGCTGTGGTT     |

**Table S5. List of primers used in *C. elegans* and *M. musculus* (Related to STAR methods).**
